# Preemptive Analgesia

## Clinical Evidence of Neuroplasticity Contributing to Postoperative Pain

Joel Katz, Ph.D.,\* Brian P. Kavanagh, M.B., B.Sc., M.R.C.P.I.,† Alan N. Sandler, M.Sc., M.B., Ch.B., F.R.C.P.C.,‡ Hilary Nierenberg, B.Sc.N.,§ John F. Boylan, M.B., F.F.A.R.C.S.I.,¶ Mark Friedlander, M.B., Ch.B., F.R.C.P.C.,|| Brian F. Shaw, Ph.D., C.Psych.\*\*

Recent evidence suggests that surgical incision and other noxious perioperative events may induce prolonged changes in central neural function that later contribute to postoperative pain. The present study tested the hypothesis that patients receiving epidural fentanyl before incision would have less pain and need fewer analgesics postoperatively than patients receiving the same dose of epidural fentanyl after incision. Thirty patients (ASA physical status 2) scheduled for elective thoracic surgery through a posterolateral thoracotomy incision were randomized to one of two groups of equal size and prospectively studied in a double-blind manner. Epidural catheters were placed via the L2-L3 or L3-L4 interspaces preoperatively, and the position was confirmed with lidocaine. Group 1 received epidural fentanyl (4 µg/kg, in 20 ml normal saline) before surgical incision, followed by epidural normal saline (20 ml) infused 15 min after incision. Group 2 received epidural normal saline (20 ml) before surgical incision, followed by epidural fentanyl (4 µg/kg, in 20 ml normal saline) infused 15 min after incision. No additional analgesics were used before or during the operation. Anesthesia was induced with thiopental (3-5 mg/kg) and maintained with N<sub>2</sub>O/O<sub>2</sub> and isoflurane. Paralysis was achieved with pancuronium (0.1 mg/kg). Postoperative analgesia consisted of patient-controlled intra-

venous morphine. Visual analogue scale pain scores were significantly less in group 1 (2.6 ± 0.44) than in group 2 (4.7 ± 0.58) 6 h after surgery ( $P < 0.05$ ), by which time plasma fentanyl concentrations had decreased to subtherapeutic levels (<0.15 ng/ml) in both groups. Patient-controlled morphine usage in group 2 (26.1 ± 5.2 mg) was significantly ( $P < 0.008$ ) greater than in group 1 (11.7 ± 2.2 mg) between 12 and 24 h after surgery, even though visual analogue scale pain scores at these times were not significantly different ( $P > 0.05$ ). The results suggest that preemptive analgesia may reduce the central consequences of surgical incision and rib retraction by preventing noxious neural impulses from gaining entry into the central nervous system. (Key words: Analgesia: postoperative. Analgesics, epidural: fentanyl. Anesthetic techniques: Epidural. Pain: neuroplasticity.)

RECENT LABORATORY and clinical studies show that injury produces a prolonged change in central nervous system function that influences responses to subsequent afferent inputs. In rodents, high-intensity electrical stimulation of afferent nerve fibers or injury to nociceptors in skin induces neural and behavioral changes that persist even when inputs from the injured region are later blocked by local anesthesia<sup>1-3</sup> or interrupted by nerve section<sup>4-7</sup> or dorsal rhizotomy.<sup>8</sup> Simply cutting afferent nerve fibers in the absence of a prior noxious conditioning stimulus produces a long-term facilitation in spinal cord cells that persists in the absence of sustaining inputs from the transected nerve.<sup>9</sup> Clinical evidence that central neural plasticity contributes to persistent pain comes from studies of amputees who complain of phantom limb pain that resembles a painful preamputation lesion in the quality of sensation and the location in the limb.<sup>10,11</sup> Taken together, the evidence suggests that noxious stimulus-induced changes in central neural function may contribute to pain long after the offending stimulus has been removed or the peripheral injury has healed.

Physiologic and behavioral studies of animals also show that noxious stimulus-induced neuroplasticity can be prevented or "preempted" by administration of analgesic agents prior to injury. Bathing peripheral nerves in a local anesthetic solution prior to nerve transection reduces the incidence of behaviors indicative of pain in the weeks after the neurectomies.<sup>12,13</sup> Pretreatment with µ-opioid receptor agonists<sup>14,15</sup> or local anesthetic agents<sup>16</sup> prevents development of injury-induced spinal hyperexcitability<sup>14,15</sup> and pain-related behaviors.<sup>16</sup> Conversely, the same treatments are significantly less effective when administered only minutes later, after the prolonged central excitability

\* Medical Research Council of Canada Fellow, Department of Psychology, The Toronto Hospital, Toronto General Division; Assistant Professor, Departments of Behavioural Science and Anaesthesia, University of Toronto.

† Research Resident in Anesthesia, Department of Anaesthesia, The Toronto Hospital, Toronto General Division.

‡ Associate Professor, Department of Anaesthesia, University of Toronto; Anesthesiologist-in-Chief, The Toronto Hospital, Toronto General Division.

§ Research Nurse in Anesthesia, Department of Anaesthesia, The Toronto Hospital, Toronto General Division.

¶ Clinical Research Fellow in Anesthesia, Department of Anaesthesia, The Toronto Hospital, Toronto General Division.

\*\* Psychologist-in-Chief, Department of Psychology, The Toronto Hospital; Professor, Departments of Behavioural Science and Psychiatry, University of Toronto.

Received from the Departments of Psychology and Anesthesia, The Toronto Hospital, Toronto General Division, and the Department of Anaesthesia, University of Toronto. Accepted for publication May 20, 1992. Supported in part by fellowships from the Ontario Ministry of Health and the Medical Research Council of Canada (J.K.). Presented in part at the Canadian Pain Society Annual Meeting, Vancouver, British Columbia, October 1991 and at the Annual Meeting of the American Society of Anesthesiologists, San Francisco, California, November 1991.

The results and conclusions derived herein are those of the authors, and no official endorsement by the Ontario Ministry of Health is intended or should be inferred.

Address correspondence to Dr. J. Katz: Psychology Department, The Toronto Hospital, Toronto General Division, 200 Elizabeth Street, CW2-306, Toronto, Ontario, Canada M5G 2C4.

or pain behaviors have been established.<sup>14-16</sup> In one study,<sup>14</sup> the dose of systemically administered morphine needed to prevent the establishment of central hyperexcitability prior to brief noxious electrical stimulation of the gastrocnemius-soleus nerve was one tenth the dose required to abolish the prolonged activity once it had developed.

These results have led to the idea that surgical incision and subsequent noxious perioperative events may also induce prolonged changes in dorsal horn neural processing that later contribute to enhanced postoperative pain.<sup>17,18</sup> Recent clinical evidence shows that a pharmacologic blockade of the somatosensory pathways using local anesthetics before surgery reduces postoperative pain intensity or lowers postoperative analgesic requirements.<sup>19-24</sup> However, the putative importance of *preemptive* blockade has not adequately been assessed: only two studies<sup>23,24</sup> administered a comparable pharmacologic blockade to a group of patients *after* incision, and only one of these was a controlled and randomized trial.<sup>23</sup> Although preincisional blockade was not associated with significantly less postoperative pain at any point in time after surgery when compared with postincisional blockade, fewer patients in the preincisional group required supplemental analgesics, and their demand for analgesics occurred later.<sup>23</sup> Taken together, these studies suggest that administration of local anesthetics before surgical trauma may reduce postoperative pain or analgesic requirements, but more information is required to determine the peripheral sources of central nervous system sensitization and the potential benefit of using other classes of analgesic agents.

The aim of the present study was to evaluate the efficacy of preemptive opioid analgesia and the specific contribution of the surgical incision and rib retraction to post-thoracotomy pain. Administration of fentanyl after incision might be expected to result in less postoperative pain intensity than would fentanyl administration before incision because the drug given earlier would be present in smaller concentrations. However, we hypothesized that if the surgical incision and other noxious perioperative events (*e.g.*, rib retraction) sensitize the central nervous system to subsequent afferent inputs, patients receiving fentanyl *before* incision would report lower pain intensity and consume fewer analgesics postoperatively than patients receiving fentanyl *after* incision.

## Materials and Methods

### PATIENT SELECTION AND RANDOMIZATION PROCEDURE

After institutional ethics committee approval and written informed consent had been obtained, 30 adult patients

(ASA physical status 2) scheduled for elective thoracic surgery through a posterolateral thoracotomy incision were randomized to one of two groups of equal size and were prospectively studied using a double-blind cross-over design (fig. 1). Exclusion criteria were contraindications to regional anesthesia, ASA physical status > 2, age less than 18 yr or greater than 76 yr, weight greater than 100 kg, incision other than posterolateral thoracotomy, sig-

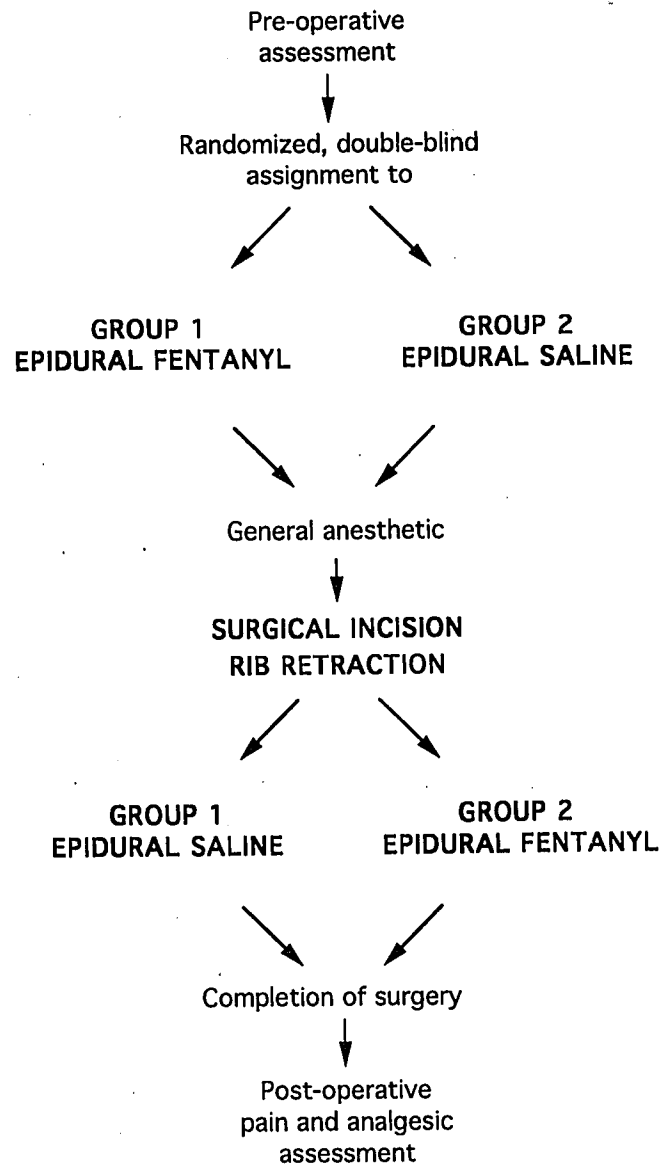

FIG. 1. Flow chart of study design. After obtaining informed written consent, patients were randomly assigned in a double-blind manner to receive an epidural infusion of fentanyl (group 1) or saline (group 2) before surgical incision and an epidural infusion of saline (group 1) or fentanyl (group 2) 15 minutes after surgical incision. Postoperative pain, patient-controlled administration of intravenous morphine, and plasma concentrations of fentanyl were measured after the completion of surgery.

nificant coronary artery disease, congestive heart failure, valvular heart disease, renal disease, hepatic disease, psychiatric history, or history of significant postoperative confusional episodes.

Before the study was begun, a table of random numbers was used to generate a randomization schedule specifying the group (1 or 2) to which each prospective patient would be assigned upon entry into the trial. An envelope containing the group assignment (and the order of fentanyl and saline infusions) was prepared, sealed, and numbered for each prospective patient. On the morning of the surgery, one of the investigators opened the patient's envelope, read its contents, and prepared two identical syringes that were labeled for preincisional and postincisional infusions. One syringe contained fentanyl, and the other contained normal saline. This investigator had no further involvement with the patient. All patients and personnel involved in patient management and data collection were unaware of the group to which the patient had been assigned. Although the anesthesiologist in charge of the case also was unaware of the patient's group, he had ready access to this information in the event of an emergency.

## ANESTHESIA

### *Epidural Analgesia*

In all patients, epidural catheters were placed *via* the L2-L3 or L3-L4 interspaces preoperatively. The position of the catheter was confirmed with administration of carbonated 2% lidocaine (5-10 ml). Patients in group 1 received epidural fentanyl by infusion (4  $\mu\text{g}/\text{kg}$  in 20 ml normal saline over 30 min) before surgical incision, followed by an infusion of epidural normal saline (20 ml over 30 min) beginning 15 min after incision. Patients in group 2 ( $n = 15$ ) received an infusion of epidural normal saline (20 ml over 30 min) before surgical incision, followed by an infusion of epidural fentanyl (4  $\mu\text{g}/\text{kg}$  in 20 ml normal saline over 30 min) beginning 15 min after incision. All infusions were delivered using computerized infusion pumps (Harvard PCA Pump, Bard, Billerica, MA). No additional preoperative or intraoperative analgesics were administered to patients in either group.

### *General Anesthesia*

Premedication consisted of oral diazepam 10 mg given 1-2 h preoperatively. While patients breathed  $\text{O}_2$ , anesthesia was induced with thiopental (3-5 mg/kg). Succinylcholine (1.0-1.5 mg/kg) was used to facilitate tracheal intubation with either a double-lumen endotracheal tube or a single-lumen tube with a bronchial blocker. Anesthesia was maintained with  $\text{O}_2/\text{N}_2\text{O}$  and halothane or isoflurane. Paralysis was achieved with pancuronium (0.1 mg/kg) and was confirmed with a nerve stimulator in all

patients. Neuromuscular blockade was reversed with neostigmine and atropine at the conclusion of surgery. The trachea was extubated after emergence and upon resumption of spontaneous breathing. Patients received supplemental  $\text{O}_2$  by mask to ensure  $\text{Pa}_{\text{O}_2}$  greater than 80 mmHg and were transported to the recovery room.

## POSTOPERATIVE MANAGEMENT

After arrival in the recovery room, patients were given access to a patient-controlled analgesia (PCA) pump system (Abbott Life Care II PCA Infuser, Chicago, IL) and given a 2-mg intravenous bolus of morphine by a nurse observer. Every 10 min during the recovery room period, patients were asked whether they needed pain relief. An affirmative response was followed by a 1.5-mg intravenous bolus of morphine administered by the nurse. This procedure was repeated until the patients were alert enough to begin administering the PCA morphine themselves. The PCA pump was set to deliver a 1.5-2.0-mg intravenous bolus dose of morphine, and the lock-out time was set at 7-10 min. This regimen of PCA was continued on the ward for 48 h, during which time no other analgesics were administered.

Blood samples were drawn 2, 4, and 6 h after the completion of surgery. Plasma fentanyl concentrations were determined at these times using a commercial radioimmunoassay kit (Janssen Laboratories, Beerse, The Netherlands). The assay was sensitive to 0.01 ng/ml with intra-assay and inter-assay coefficients of variation of 6.0% and 6.9%, respectively, at 1.0 ng/ml. A 10-cm visual analogue scale (VAS) (with endpoints labeled "no pain" and "worst possible pain") was used to assess pain intensity 2, 4, 6, 12, 24, and 48 h after the completion of surgery. Side effects (nausea, vomiting, pruritus) were recorded if present.

## DATA ANALYSIS

Before the start of the study, we estimated the sample size<sup>25</sup> required for a test of the hypothesis that postoperative pain would be less in group 1 than in group 2. Based on previous research<sup>26</sup> at our institution using the same outcome measure (*i.e.*, VAS for postoperative pain) and the same surgical population, and posterolateral incision, estimates of the effect size and variance were used to calculate the sample size ( $n = 15$  per group) required to give the study a power of 0.9 (and a type I error rate of 0.05). Demographic and clinical data from groups 1 and 2 were compared using Fisher's exact test (for non-parametric variables) and unpaired, two-tailed *t* tests (for parametric variables).

VAS pain intensity scores and plasma fentanyl concentrations were analyzed by a two-way repeated-measures analysis of variance using group as the independent sam-

TABLE 1. Frequency of Diagnoses and Surgical Procedures for the Two Groups

|                                                                                     | Group 1* | Group 2 |
|-------------------------------------------------------------------------------------|----------|---------|
| <b>Diagnosis</b>                                                                    |          |         |
| Bronchiogenic carcinoma                                                             | 12       | 9       |
| Esophageal surgery (nonmalignant)                                                   | 1        | 3       |
| Miscellaneous (pulmonary infarct, bronchiectasis, neurogenic and metastatic tumors) | 2        | 3       |
| <b>Procedure</b>                                                                    |          |         |
| Lobectomy                                                                           | 10       | 9       |
| Wedge resection                                                                     | 3        | 2       |
| Hiatus hernia repair                                                                | 1        | 3       |
| Neurogenic tumor excision                                                           | 1        | 1       |

All procedures involved a full posterolateral thoracotomy.

\* Not statistically different from group 2 in diagnosis or procedure ( $P > 0.05$  by Fisher's exact test).

ples factor and time after surgery as the repeated-measurements factor. A significant group-by-time interaction term was followed by *post hoc* tests of significance using Tukey's method<sup>27</sup> to compare the two groups at various points in time. Group medians were used to estimate missing VAS pain scores (e.g., when patients were not awakened for pain assessments) for the analysis of variance. Less than 5% of total data were missing. PCA morphine consumption (milligrams) from groups 1 and 2 was compared with unpaired, one-tailed *t* tests using Bonferroni's type I error rate correction for multiple tests of significance (i.e.,  $\alpha$  per number of tests). Recent studies<sup>28,29</sup> have shown that VAS pain intensity scores have ratio scale properties, making it appropriate to analyze VAS scores using parametric descriptive and inferential statistical procedures.

Data are presented as frequencies or percentages (for nonparametric variables) or as means  $\pm$  SEM (for parametric variables).  $P < 0.05$  was considered statistically significant for all tests.

## Results

### DEMOGRAPHICS AND CLINICAL VARIABLES

Demographic and clinical variables for the two groups are presented in tables 1 and 2. With the exception of age, the two groups were not statistically different. The significant age difference shown in table 2 is due to two patients in group 2 whose ages were each more than two standard deviations less than the mean age of the entire sample of 30 patients. Removing these two patients from the data set produced a nonsignificant age difference between the groups and did not alter the outcome of the statistical analyses of VAS pain scores or morphine requirements as reported below based on the entire sample of 30 patients. Thus, the observed differences in postoperative pain and morphine consumption reported below are not attributable to the age difference between the groups, and all analyses reported below include the data from the two aforementioned patients.

The mean duration of surgery, blood loss, and the total dose of fentanyl received by each patient did not differ significantly between the groups (table 2). Table 2 shows that the fentanyl infusion in group 1 was started an average of 85 min before surgical incision.

### POSTOPERATIVE PAIN AND ANALGESIC CONSUMPTION

Figure 2 shows that 6 h after the completion of surgery, VAS pain intensity scores were significantly less ( $F(5,140) = 2.40, P < 0.04$  for analysis of variance interaction and  $Q = 4.88, P < 0.05$ , for Tukey's test) in the group that received fentanyl *before* incision ( $2.6 \pm 0.44$ ) compared with the group that received fentanyl *after* incision ( $4.7 \pm 0.58$ ), even though patients in group 2 had received the opioid 85 min earlier than those in group 1 (table 2). The significant difference in pain intensity at 6 h could

TABLE 2. Demographic Data and Clinical Variables for the Two Treatment Groups

| Variable                                                 | Group 1      | Group 2      | P    |
|----------------------------------------------------------|--------------|--------------|------|
| Age (yr)                                                 | 61.9 (2.8)   | 49.5 (4.7)   | 0.03 |
| Weight (kg)                                              | 70.9 (3.7)   | 71.1 (3.3)   | NS   |
| Males (n)                                                | 6            | 12           | NS   |
| Time (min) between start of first infusion and incision* | 85 (10.9)    | 65 (7.7)     | NS   |
| Duration of surgery (min)                                | 180 (18.0)   | 188 (9.0)    | NS   |
| Blood loss (ml)                                          | 292 (48.3)   | 287 (29.9)   | NS   |
| Total fentanyl dose ( $\mu$ g)                           | 283.5 (14.8) | 284.5 (13.2) | NS   |

Data are presented as means with SEM in parentheses unless otherwise specified.

NS = difference not significant.

\* The first infusion contained fentanyl in group 1 and saline in

group 2. The second infusion was started 15 minutes after surgical incision in both groups and contained saline in group 1 and fentanyl in group 2.

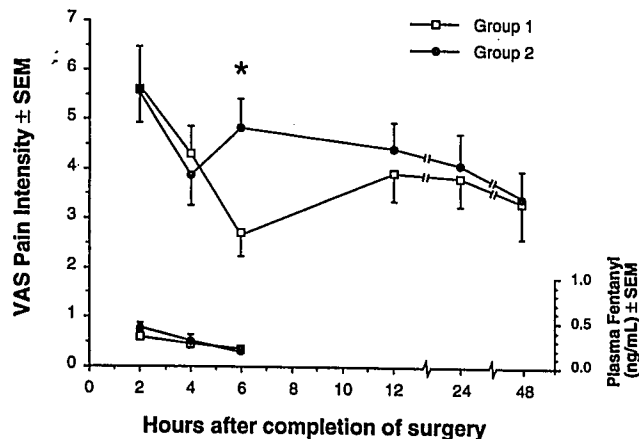

FIG. 2. Mean postoperative visual analogue scale (VAS) pain intensity scores for groups 1 and 2. Zero hours after the completion of surgery corresponds to the time when patients were admitted to the recovery room after the thoracotomy. \* $P < 0.05$ .

not be explained by lingering plasma concentrations of fentanyl (fig. 2), which, at the time of pain assessment, were subtherapeutic ( $< 0.15$  ng/ml) in both groups ( $P > 0.05$ ), or by PCA morphine consumption, which until this time was virtually identical in group 1 ( $19.5 \pm 2.2$  mg) and group 2 ( $16.8 \pm 2.1$  mg), as shown in figure 3. However, figure 3 also shows that between 12 and 24 h after surgery, PCA morphine consumption by patients in group 1 ( $11.7 \pm 2.2$  mg) was significantly less ( $t$  (28) = 2.55,  $P < 0.008$ , one-tailed) than that in group 2 patients ( $26.1 \pm 5.2$  mg), although VAS pain scores at these times were not significantly different ( $P > 0.05$ ). No side effects were observed.

### Discussion

The results of the present study demonstrate the benefits of preincisional *versus* postincisional epidural fentanyl on postoperative pain and analgesic consumption using a randomized, double-blind, placebo-controlled crossover design. Six hours after the completion of surgery, patients who received lumbar epidural fentanyl before incision had less pain than patients who received the same dose of fentanyl by the same route 15 min after incision. The finding that intergroup comparisons of VAS pain scores were not different 12 or 24 h after surgery (fig. 2) when PCA consumption in group 2 was more than twice that of group 1 (fig. 3) suggests that the additional morphine used by group 2 reduced their pain to a level comparable to that of group 1. Preemptive analgesia may protect patients from the deleterious effects of surgical incision and other noxious perioperative events (rib retraction) long after the operation has been performed.

The lower postoperative pain intensity ratings and

morphine consumption among patients who had received pharmacologic blockade before surgical incision were observed sufficiently long after the administration of fentanyl in both groups to rule out the possibility that residual concentrations of fentanyl in the blood contributed to postoperative analgesia. An extended spinal action of fentanyl also is unlikely because the significant intergroup difference in pain was observed more than 10 and 8 h after fentanyl administration in groups 1 and 2, respectively (table 2), and the difference in morphine consumption was observed more than 30 h later. Finally, a synergistic effect of fentanyl with the test dose of lidocaine is unlikely to have produced extended or enhanced analgesia in group 1, because the addition of a more potent epidural local anesthetic solution does not potentiate the analgesic effects of epidural fentanyl after knee replacement<sup>30</sup> or thoracic surgery.<sup>31</sup>

Skin incision and subsequent transmission of neural impulses from the surgical site to the spinal cord mark the beginning of a process of central neural sensitization that may be enhanced by other noxious perioperative events. In present study, use of rib retractors after incision may have damaged intercostal nerves. In addition, ribs may split or fracture, and the rib periosteum may be denuded.<sup>32</sup> Detectable onset of analgesia after lumbar epidural fentanyl occurs as early as 4 min after injection,<sup>33,34</sup> and peak analgesia occurs approximately 15–20 min later.<sup>34</sup> Because the fentanyl infusion in group 2 was started 15 min after incision, it is reasonable to assume that maximum nociceptive blockade was achieved 20–60 min later so that noxious impulses may have continued to reach the spinal cord for as long as 75 min after skin incision.

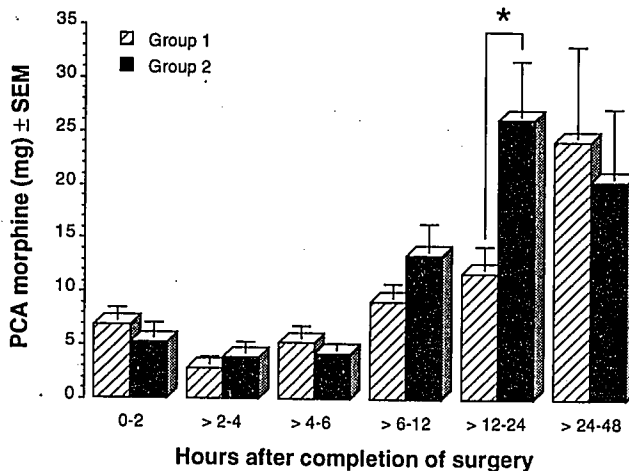

FIG. 3. Mean postoperative PCA morphine consumption for groups 1 and 2. Morphine consumption in the early hours (0–4 h) after the completion of surgery includes both nurse- and patient-administered doses. \* $P < 0.008$ .

Although preoperative administration of fentanyl resulted in significantly less pain and analgesic use, these effects were limited to the period between 6 and 24 h after surgery. Several aspects of the present design suggest that these effects underestimate the true potency of preemptive analgesia. First, for a given dose of fentanyl, use of lumbar epidural catheters for thoracic surgery may have reduced the degree of analgesia that might have been achieved had thoracic epidural catheters been used.<sup>35,36</sup> Second, use of fentanyl may have only attenuated the noxious effects of surgical incision in group 1, whereas a local anesthetic would have been expected to block it completely. Third, group 2 received the fentanyl 15 min after surgical incision in the course of a 3-h operation. Thus, we did not allow patients in this group to be exposed to the full extent of the surgical trauma. Taken together, these three considerations suggest that the results of the present study provide a conservative estimate of the true effectiveness of preemptive analgesia.

The difference in pain between the two groups did not emerge until 6 h after the completion of surgery. The absence of a difference before this point may reflect the time required for the central effects of the surgical incision to become fully established or the overwhelming contribution of peripheral inputs from the wound, which would mask the central component in the early hours after surgery. This result is not unlike the biphasic pattern of pain behavior exhibited by rats after subcutaneous injection of dilute formalin into the hindpaw.<sup>16</sup> Recent evidence suggests that dorsal horn activity associated with the late phase of formalin-induced pain may be dependent upon spinal activity during the first phase immediately after formalin injection.<sup>15,16,37</sup>

The present results are consistent with recent findings from animal studies<sup>14,15</sup> showing that  $\mu$ -opioid receptor agonists administered before noxious stimulation can prevent or markedly reduce the prolonged spinal hyperactivity that otherwise develops. The finding that morphine consumption in group 2 was more than twice that of group 1 during the period between 12 and 24 h after surgery parallels the results of a study by Woolf and Wall<sup>14</sup> showing that, in rats, the dose of morphine required to abolish noxious stimulus-induced central hyperactivity was many times that required to prevent these prolonged central consequences when administered before injury. The present data are also consistent with clinical observations that relief of preamputation pain reduces the incidence of phantom limb and stump pain<sup>38</sup> and that pain after surgery<sup>19-24,39,40</sup> and dental work<sup>41,42</sup> is decreased by administering analgesic agents before the surgical trauma.

Although the precise mechanisms by which tissue damage produces prolonged alterations in central neural processing have yet to be fully elucidated, recent evidence suggests that C-fiber excitatory amino acids<sup>43,44</sup> and

neuropeptides<sup>44-46</sup> may facilitate plastic changes in spinal cord dorsal horn neurons induced by noxious stimulation. There is evidence that these changes (*e.g.*, central sensitization and windup) are dependent on N-methyl-D-aspartic acid (NMDA) receptor activation<sup>47-49</sup> and that NMDA receptor antagonists may prevent or reverse central sensitization (and behaviors indicative of pain) when administered before<sup>48,50</sup> or after injury<sup>48</sup> even though they do not affect the cell's normal physiologic response to injury.<sup>48</sup> The prolonged changes in nociceptive processing that develop after tissue-damaging injury contrast with the relatively short-lasting postsynaptic actions of C-fiber excitatory amino acids and neuropeptides. Longer-lasting changes in neural function after injury-induced NMDA receptor activation may be brought about by intracellular second messengers<sup>51,52</sup> that would stimulate protein kinases<sup>53</sup> or new gene expression.<sup>54-56</sup> Careful and thorough clinical trials are required to determine whether agents that act at sites on the NMDA receptor (*e.g.*, the noncompetitive antagonist, ketamine, or less potent  $\sigma$  opiates such as pentazocine) also confer protection from needless pain if administered to patients before surgical incision.

In conclusion, epidural administration of fentanyl before surgical incision resulted in lower postoperative pain intensity and reduced postoperative morphine requirements when compared with the same dose and route of fentanyl administered 15 min after incision. The changes in central neural function that are presumed to underlie this effect are induced by surgical incision and other noxious inputs during the surgical operation. One consequence of this central sensitization appears to be an alteration in postoperative pain perception, such that noxious inputs from the surgical wound (*e.g.*, due to mobilization or dressing changes) may be more painful than they would otherwise have been and that innocuous inputs (*e.g.*, gentle touch) may give rise to frank pain. Preemptive analgesia may attenuate or prevent the development of central sensitization induced by surgical incision and later maintained by inputs from the wound.

The authors are grateful for the help provided by the staff of the Departments of Anaesthesia and Thoracic Surgery and the PACU. The authors also thank Dr. R. Melzack and Dr. G. Edelist for their helpful comments on the manuscript and Dr. G. Koren for performing the plasma fentanyl assays.

## References

1. Woolf CJ: Evidence for a central component of post-injury pain hypersensitivity. *Nature (Lond)* 306:686-688, 1983
2. Woolf CJ: Long-term alterations in the excitability of the flexor reflex produced by peripheral tissue injury in the chronic deafferented rat. *Pain* 18:325-343, 1984
3. Woolf CJ, Wall PD: Relative effectiveness of C primary afferent fibers of different origins in evoking a prolonged facilitation of the flexor reflex in the rat. *J Neurosci* 6:1433-1442, 1986
- 4.Coderre TJ, Melzack R: Increased pain sensitivity following heat

- injury involves a central mechanism. *Behav Brain Res* 15:259-262, 1985
5. Coderre TJ, Grimes RW, Melzack R: Autotomy after nerve sections in the rat is influenced by tonic descending inhibition from locus coeruleus. *Neurosci Lett* 67:82-86, 1986
  6. Katz J, Vaccarino AL, Coderre TJ, Melzack R: Injury prior to neurectomy alters the pattern of autotomy in rats. *ANESTHESIOLOGY* 75:876-883, 1991
  7. Coderre TJ, Melzack R: Cutaneous hyperalgesia: Contributions of the peripheral and central nervous systems to the increase in pain sensitivity after injury. *Brain Res* 404:95-106, 1987
  8. Dennis SG, Melzack R: Self-mutilation after dorsal rhizotomy in rats: Effects of prior pain and pattern of root lesions. *Exp Neurol* 65:412-421, 1979
  9. Wall PD, Woolf CJ: Muscle but not cutaneous C-afferent input produces prolonged increases in the excitability of the flexion reflex in the rat. *J Physiol (Lond)* 356:443-458, 1984
  10. Jensen TS, Krebs B, Nielsen J, Rasmussen P: Immediate and long-term phantom pain in amputees: Incidence, clinical characteristics and relationship to pre-amputation pain. *Pain* 21:268-278, 1985
  11. Katz J, Melzack R: Pain "memories" in phantom limbs: Review and clinical observations. *Pain* 43:319-336, 1990
  12. González-Darder JM, Barberá J, Abellán MJ: Effects of prior anaesthesia on autotomy following sciatic transections in rats. *Pain* 24:87-91, 1986
  13. Seltzer Z, Beilin BZ, Ginzburg R, Paran Y, Shimko T: The role of injury discharge in the induction of neuropathic pain behavior in rats. *Pain* 46:327-336, 1991
  14. Woolf CJ, Wall PD: Morphine-sensitive and morphine-insensitive actions of C-fibre input on the rat spinal cord. *Neurosci Lett* 64:221-225, 1986
  15. Dickenson AH, Sullivan AF: Subcutaneous formalin-induced activity of dorsal horn neurones in the rat: Differential response to an intrathecal opiate administered pre or post formalin. *Pain* 30:349-360, 1987
  16. Coderre TJ, Vaccarino AL, Melzack R: Central nervous system plasticity in the tonic pain response to subcutaneous formalin injection. *Brain Res* 535:155-158, 1990
  17. Wall PD: The prevention of post-operative pain. *Pain* 33:289-290, 1988
  18. Woolf CJ: Recent advances in the pathophysiology of acute pain. *Br J Anaesth* 63:139-146, 1989
  19. Tverskoy M, Cozacov C, Ayache M, Bradley EL, Kissin I: Post-operative pain after inguinal herniorrhaphy with different types of anaesthesia. *Anesth Analg* 70:29-35, 1990
  20. Bugeo GJ, Cárcamo CR, Mertens RA, Dagnino JA, Munoz HR: Preoperative percutaneous ilioinguinal and iliohypogastric nerve block with 0.5% bupivacaine for post-herniorrhaphy pain management in adults. *Reg Anesth* 15:130-133, 1990
  21. Jelebes JA, Reilly JS, Guiterrez JF, Bradley EL, Kissin I: The effect of pre-incisional infiltration of tonsils with bupivacaine on the pain following tonsillectomy under general anaesthesia. *Pain* 47:305-308, 1991
  22. Ågren K, Engquist S, Danneman A, Feychting B: Local versus general anaesthesia in tonsillectomy. *Clin Otolaryngol* 14:97-100, 1989
  23. Ejlersen E, Bryde Anderson H, Eliassen K, Mogensen T: A comparison between preincisional and postincisional lidocaine infiltration and postoperative pain. *Anesth Analg* 74:495-498, 1992
  24. Ringrose NH, Cross MJ: Femoral nerve block in knee joint surgery. *Am J Sports Med* 12:398-402, 1984
  25. Stolley PD, Strom BL: Sample size calculations for clinical pharmacology studies. *Clin Pharmacol Ther* 39:489-490, 1986
  26. Shulman M, Sandler AN, Bradley JW, Young PS, Brebner J: Post-thoracotomy pain and pulmonary function following epidural and systemic morphine. *ANESTHESIOLOGY* 61:569-575, 1984
  27. Olson CL: *Statistics: Making Sense of Data*. Boston, Allyn and Bacon, Inc., 1987, pp 747-748
  28. Price DD, McGrath PA, Rafii A, Buckingham B: The validation of visual analogue scales as ratio scale measures for chronic and experimental pain. *Pain* 17:45-56, 1983
  29. Price DD: *Psychological and Neural Mechanisms of Pain*. New York, Raven Press, 1988, pp 18-38
  30. Badner NH, Reimer EJ, Komar WE, Moote CA: Low-dose bupivacaine does not improve postoperative epidural fentanyl analgesia in orthopedic patients. *Anesth Analg* 72:337-341, 1991
  31. Badner NH, Komar WE: Bupivacaine 0.1% does not improve postoperative epidural fentanyl analgesia after abdominal or thoracic surgery. *Can J Anaesth* 39:330-336, 1992
  32. Conacher ID: Pain relief after thoracotomy. *Br J Anaesth* 65: 806-812, 1990
  33. Birnbach DJ, Johnson MD, Arcario T, Datta S, Naulty JS, Osheimer GW: Effect of diluent volume on analgesia produced by epidural fentanyl. *Anesth Analg* 68:808-810, 1989
  34. Cousins MJ, Mather LE: Intrathecal and epidural administration of opioids. *ANESTHESIOLOGY* 61:276-310, 1984
  35. Salomäki TE, Laitinen JO, Nuutinen LS: A randomized double-blind comparison of epidural versus intravenous fentanyl for analgesia after thoracotomy. *ANESTHESIOLOGY* 75:790-795, 1991
  36. Sawchuk CWT, Ong B, Unruh H, Horan T, Greengrass R: Comparison of thoracic and lumbar epidural fentanyl infusions for post-thoracotomy pain. *Can J Anaesth* 38:A44, 1991
  37. Vaccarino AL, Marek P, Liebeskind JC: Stress-induced analgesia prevents the development of the tonic, late phase of pain produced by subcutaneous formalin. *Brain Res*, in press
  38. Bach S, Noreng MF, Tjélden NU: Phantom limb pain in amputees during the first 12 months following limb amputation, after preoperative lumbar epidural blockade. *Pain* 33:297-301, 1988
  39. Mann RAM, Bisset WIK: Anaesthesia for lower limb amputation. A comparison of spinal analgesia and general anaesthesia in the elderly. *Anaesthesia* 38:1185-1191, 1983
  40. McQuay HJ, Carroll D, Moore RA: Post-operative orthopaedic pain: The effect of opiate premedication and local anaesthetic blocks. *Pain* 33:291-295, 1988
  41. Hutchins HC, Reynolds OE: Experimental investigation of the referred pain of aerodontalgia. *J Dent Res* 26:3-8, 1947
  42. Reynolds OE, Hutchins HC: Reduction of central hyper-irritability following block anaesthesia of peripheral nerve. *Am J Physiol* 152:658-662, 1948
  43. Skilling SR, Smullin DH, Larson AA: Extracellular amino acid concentrations in the dorsal spinal cord of freely moving rats following veratridine and nociceptive stimulation. *J Neurochem* 51:1988
  44. Wilcox GL: Excitatory neurotransmitters and pain, *Proceedings of the VIth World Congress on Pain*. Edited by Bond MR, Charlton JE, Woolf CJ. Amsterdam, Elsevier Science Publishers BV, 1991, pp 97-117
  45. Go VLW, Yaksh TL: Release of substance P from the cat spinal cord. *J Physiol (Lond)* 391:141-167, 1987
  46. Kuraishi Y, Hirota N, Sato Y, Hanashima N, Takagi H, Satoh M: Stimulus specificity of peripherally evoked substance P release from the rabbit dorsal horn in situ. *Neuroscience* 30:241-250, 1989
  47. Davies SN, Lodge D: Evidence for involvement of N-methylaspartate receptors in "wind-up" of class 2 neurones in the dorsal horn of the rat. *Brain Res* 424:402-406, 1987
  48. Woolf CJ, Thompson SWN: The induction and maintenance of

- central sensitization is dependent on N-methyl-D-aspartic acid receptor activation: Implications for the treatment of post-injury pain hypersensitivity states. *Pain* 44:293-299, 1991
49. Thompson SWN, King AE, Woolf CJ: Activity-dependent changes in rat ventral horn neurones in vitro: Summation of prolonged postsynaptic depolarizations produce d-APV sensitive windup. *Eur J Neurosci* 2:638-649, 1990
50. Seltzer M, Cohn S, Ginzberg R, Beilin B: Modulation of neuropathic pain behavior in rats by spinal disinhibition and NMDA receptor blockade of injury discharge. *Pain* 45:69-75, 1991
51. MacDermott AB, Mayer ML, Westbrook GL, Smith SJ, Barker JL: NMDA-receptor activation increases cytoplasmic calcium concentration in cultured spinal cord neurones. *Nature* 321: 519-522, 1986
52. Smart TG: Excitatory amino acids: The involvement of second messengers in the signal transduction process. *Cell Mol Neurobiol* 9:193-206, 1989
53. Nestler EJ, Greengard P: Protein phosphorylation in brain. *Nature* 305:583-588, 1983
54. Hunt SP, Pini A, Evan G: Induction of *c-fos*-like protein in spinal cord neurons following sensory stimulation. *Nature* 328:632-634, 1987
55. Kehl LJ, Gogas KR, Lichtblau L, Pollack CH, Mayes M, Basbaum AI, Wilcox GL: The NMDA antagonist MK801 reduces noxious stimulus-evoked FOS expression in the spinal cord dorsal horn, Proceedings of the VIth World Congress on Pain. Edited by Bond MR, Charlton JE, Woolf CJ. Amsterdam, Elsevier Science Publishers BV, 1991, pp 307-311
56. Presley RW, Menetrey D, Levine JD, Basbaum AI: Systemic morphine suppresses noxious stimulus-evoked Fos protein-like immunoreactivity in the rat spinal cord. *J Neurosci* 10:323-335, 1990
